# Supplementary material for: Fast regulation of the NF-κB signalling pathway in human skeletal muscle revealed by high-intensity exercise and ischaemia at exhaustion: Role of oxygenation and metabolite accumulation
Source: PubMed Central journal article supplement (PMC9287614; doi:10.1016/j.redox.2022.102398), 2022-07-08

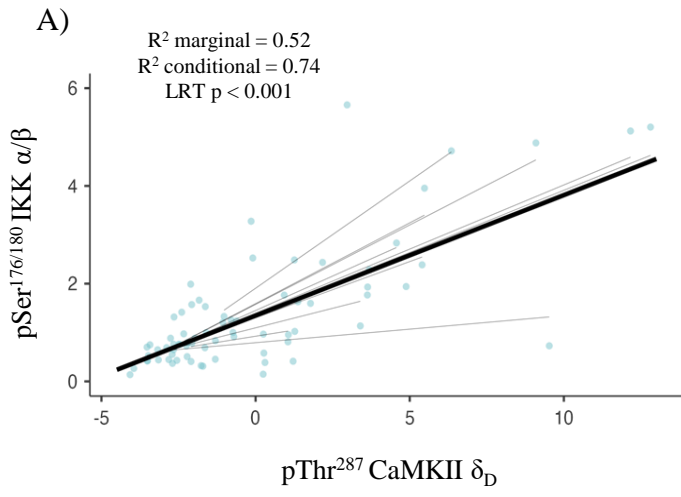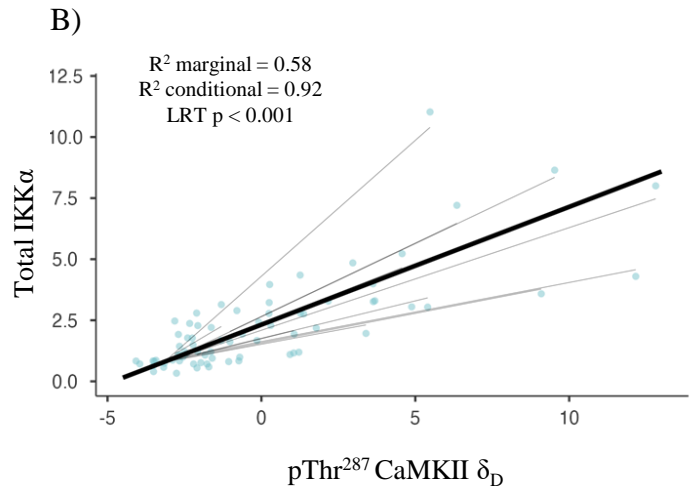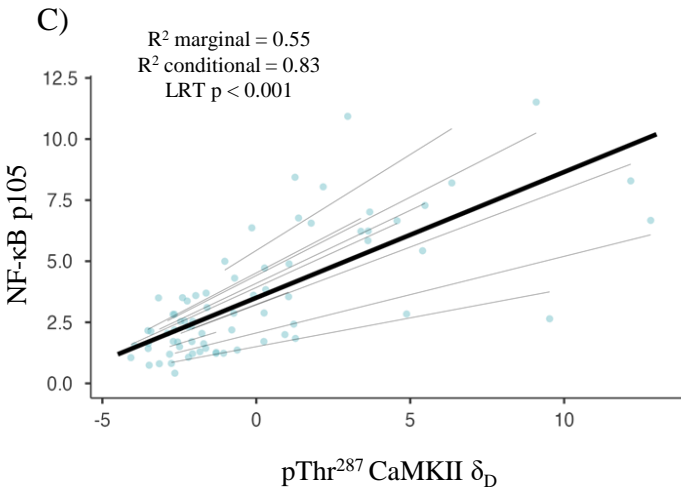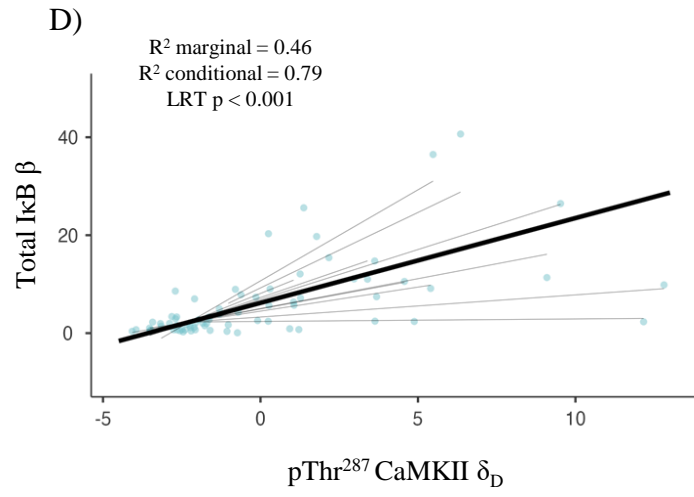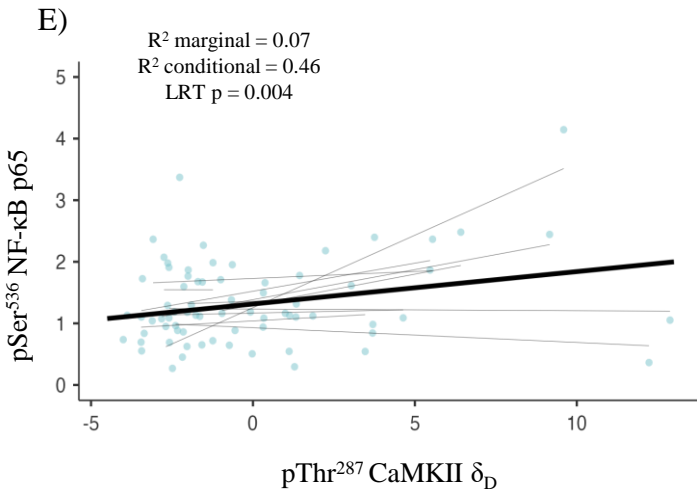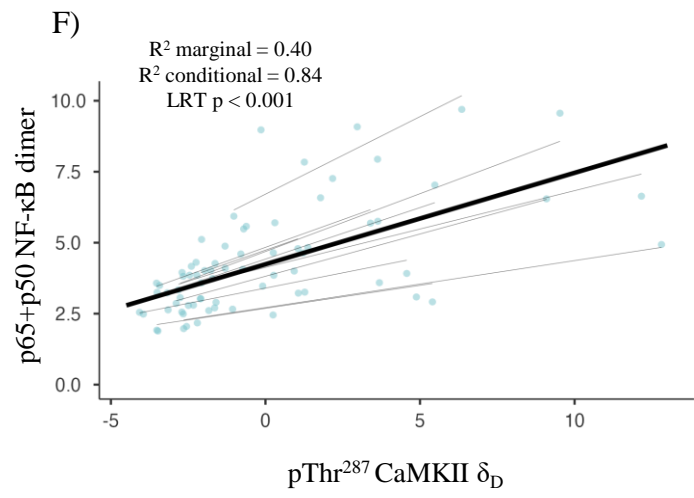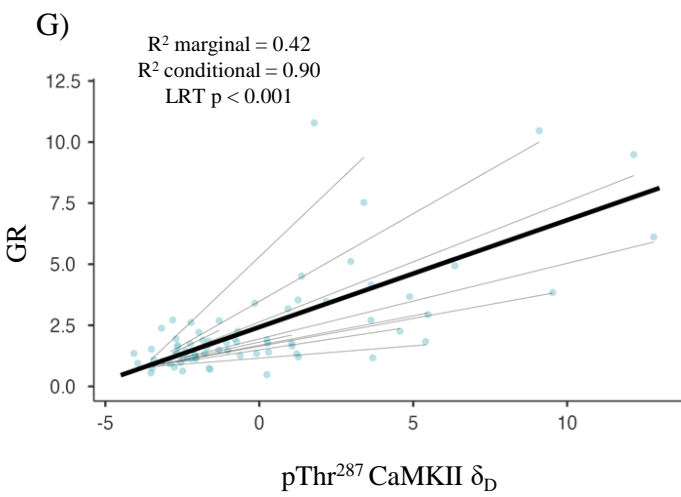

Supplement: mmc1.pdf [file mmc1.pdf]
